RESEARCH ARTICLE

# Quantitative theory of deep brain stimulation of the subthalamic nucleus for the suppression of pathological rhythms in Parkinson's disease

Eli J. Müller<sup>1,2\*</sup>, Peter A. Robinson<sup>1,2</sup>

**1** School of Physics, The University of Sydney, Sydney, New South Wales, Australia, **2** Center for Integrative Brain Function, The University of Sydney, Sydney, New South Wales, Australia

\* [eli.muller@sydney.edu.au](mailto:eli.muller@sydney.edu.au)

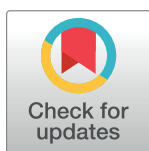

## Abstract

Deep brain stimulation (DBS) of the subthalamic nucleus (STN) is modeled to explore the mechanisms of this effective, but poorly understood, treatment for motor symptoms of drug-refractory Parkinson's disease and dystonia. First, a neural field model of the corticothalamic-basal ganglia (CTBG) system is developed that reproduces key clinical features of Parkinson's disease, including its characteristic 4–8 Hz and 13–30 Hz electrophysiological signatures. Deep brain stimulation of the STN is then modeled and shown to suppress the pathological 13–30 Hz (beta) activity for physiologically realistic and optimized stimulus parameters. This supports the idea that suppression of abnormally coherent activity in the CTBG system is a major factor in DBS therapy for Parkinson's disease, by permitting normal dynamics to resume. At high stimulus intensities, nonlinear effects in the target population mediate wave-wave interactions between resonant beta activity and the stimulus pulse train, leading to complex spectral structure that shows remarkable similarity to that seen in steady-state evoked potential experiments.

## OPEN ACCESS

**Citation:** Müller EJ, Robinson PA (2018) Quantitative theory of deep brain stimulation of the subthalamic nucleus for the suppression of pathological rhythms in Parkinson's disease. *PLoS Comput Biol* 14(5): e1006217. <https://doi.org/10.1371/journal.pcbi.1006217>

**Editor:** Saad Jbabdi, Oxford University, UNITED KINGDOM

**Received:** January 21, 2018

**Accepted:** May 21, 2018

**Published:** May 29, 2018

**Copyright:** © 2018 Müller, Robinson. This is an open access article distributed under the terms of the [Creative Commons Attribution License](https://creativecommons.org/licenses/by/4.0/), which permits unrestricted use, distribution, and reproduction in any medium, provided the original author and source are credited.

**Data Availability Statement:** All relevant data are within the paper.

**Funding:** This work was supported by the Australian Research Council Center of Excellence for Integrative Brain Function under ARC grant CE140100007 and by Australian Research Council Laureate Fellowship Grant FL140100025. The funders had no role in study design, data collection and analysis, decision to publish, or preparation of the manuscript.

## Author summary

Pathological 13-30 Hz (beta) oscillations within the basal ganglia are a characteristic feature of human Parkinson's disease which seem to correlate with symptom severity. The origin of these oscillations and the suppressive mechanism of effective deep brain stimulation treatments remains to be shown. We formulate a physiologically based population model of the corticothalamic-basal ganglia system that produces 13-30 Hz oscillations in the neural circuit formed between the globus pallidus pars externa and the subthalamic nucleus and the hyperdirect corticothalamic-basal ganglia pathway. We then develop a model of deep brain stimulation applied to the corticothalamic-basal ganglia system that permits systematic determination of effective stimulus protocols, which have been estimated by trial and error to date. Our results demonstrate that high pulse frequency (>140 Hz) stimulation is required to effectively suppress the pathological oscillations, which

**Competing interests:** The authors have declared that no competing interests exist.

agrees with clinically used values. Interactions between these oscillations and the applied stimulus also lead to complex spectral structure that shows remarkable similarity to that seen in steady-state evoked potential experiments.

## Introduction

Deep brain stimulation (DBS) has become an effective treatment for a number of neurological disorders such as Parkinson's disease (PD) and essential tremor [1, 2]. In Parkinson's disease DBS treatments, a macroelectrode is chronically implanted in a target nucleus, typically either the globus pallidus internus (GPi), subthalamic nucleus (STN), or the ventral intermediate nucleus of the thalamus; this electrode delivers high frequency (>100 Hz) electrical stimulation as a series of pulses. More broadly, studies have also shown the efficacy of DBS treatments in dystonia [3], epilepsy [4], and obsessive-compulsive disorder [5].

Significant progress has been made exploring the influence of DBS on neural activity [6]. However, the efficacy of DBS treatments could be improved with a greater understanding of the underlying therapeutic mechanisms. Furthermore, it is unclear what stimulation parameters, electrode geometries, and electrode locations are most effective for the present and future uses of DBS technologies.

Electrical stimulation of the brain influences a variety of mechanisms involved in the function and signaling of neurons. The sensitivity of different contributing elements depends upon the amplitude and temporal properties of the stimulation [7], geometry of the stimulus field [8], target cell physiology and geometry [9], and the possible pathophysiology of different disease states [10]. It is known that distinct neuron types possess different types of ion channels and that these may have different voltage-sensitive activation and inactivation properties [11]. Thus, the effect of DBS on a single neuron's dynamics may vary significantly between brain regions. However, by averaging over millimeter to whole-brain scales, a generalized description of DBS at a population level may provide insights into the net effect of these different mechanisms and allow prediction of effective stimulation protocols.

It was initially thought that deep brain stimulation had a predominantly inhibitory effect on the stimulated population due to similar therapeutic effects to lesioning [12, 13]. This inhibition hypothesis is supported by several experimental findings in STN-DBS of rats [14] and monkeys [15] and GPi-DBS and STN-DBS in humans [16, 17, 18]. Furthermore, [19] demonstrated an inhibitory response to GPi-DBS that was mediated by the GABA receptors and that this inhibition could be blocked via a GABA antagonist.

Seemingly in contradiction with the inhibition hypothesis, several experiments with recordings in efferent nuclei of the DBS target population indicate an increase in the stimulated populations activity [20, 21, 22], and an entrainment of local neural firing during DBS [23].

Several modeling approaches have been used to elucidate DBS effects across multiple scales. Finite element methods used in conjunction with multi-compartment neuron models have explored DBS responses in small neural assemblies [24, 25, 8], and the distribution of the applied electric field [26]. These single cell models have demonstrated a disassociation of activity at the soma relative to the axon during extracellular stimulation [24], and a systemic activation of axons both efferent and afferent to the stimulation site [27]. The variable nature of response to DBS between brain regions might then be understood by approximating DBS as an activation of intrinsic axons within a certain effective range of the electrode, and thus could explain observations supporting the contradictory excitation and inhibition hypotheses.

Parkinson's disease (PD) is a neurodegenerative disorder characterized by motor dysfunction including akinesia, bradykinesia, tremor, and rigidity [28]. These clinical manifestations have been linked to dopaminergic denervation in the substantia nigra pars compacta (SNc) and synucleinopathy leading to Lewy bodies, and neurites in the SNc and other brain regions [29]. The firing pattern hypothesis regarding PD proposes that pathological oscillations and/or synchronization play a primary role in motor symptoms of the disorder. Single unit and local field potential recordings have shown enhanced activity within and between the basal ganglia (BG), thalamus and motor cortex at about 4–8 Hz and 13–30 Hz [30, 31, 32, 33, 34], which seems to correlate with significant coherence at these frequencies [35, 36, 37, 38, 39, 40]. It has thus been suggested that these pathological rhythms cause a disturbance of motor-related information processing in the BG [41], which could explain some PD symptoms.

The enhanced beta band oscillations (13–30 Hz) found in the STN of PD patients are thought to be related to symptom severity, based on direct correlation results [42], as well as observations of a reduction in beta power following treatments that ameliorate PD symptoms, such as dopaminergic supplementation [43] and deep brain stimulation [44]. Several experimental and modelling studies have suggested that the circuit formed between the STN and GPe may be responsible for beta activity generation [45, 46], and that cortical excitatory inputs to the STN amplify them [47]. However, the origin of parkinsonian beta activity is still a matter of debate.

Physiologically based mean-field models of the brain provide a tractable framework for the analysis of large-scale neuronal dynamics by averaging microscopic structure and activity [48, 49, 50, 51, 52]. Neural field theory incorporates realistic anatomy of neural populations, nonlinear neural response, interpopulation connections and dendritic, synaptic, cell-body, and axonal dynamics [48, 50, 52, 53, 54, 55, 56, 57, 58]. Neural field models have been successful in accounting for many characteristic states of brain activity including sleep stages, eyes-open, and eyes-closed in waking, nonlinear seizure dynamics, anesthesia and many other phenomena [52, 53, 55, 51, 59, 60, 61, 62].

In the particular case of Parkinson's disease, neural field models of the corticothalamic-basal ganglia system have been able to account for several electrophysiological correlates of the disease including changes in population average activity, and ~4–8 Hz and ~13–30 Hz oscillations characteristic of EEG and LFP spectra [63, 64, 65]. However, the generative mechanisms of these characteristic PD rhythms is still a matter of debate.

The core aims of this work are to develop a population level description of DBS of the corticothalamic-basal ganglia (CTBG) system that can account for experimental observations and the results of other modeling studies. The work will explore parkinsonian states of the CTBG system and determine whether subthalamo-pallidal circuits can sustain characteristic beta oscillations in this framework. Finally, the effects of DBS on these parkinsonian states will be analyzed and provide insights into the efficacy of DBS treatments.

## Materials and methods

### CTBG model

Fig 1 shows a schematic of the CTBG model. The system contains nine distinct neural populations across three brain regions. The cerebral cortex contains populations of excitatory pyramidal neurons,  $e$ , and inhibitory interneurons,  $i$ . The thalamus is divided into an excitatory population for the specific relay nuclei (SRN),  $s$ , and an inhibitory population for the thalamic reticular nucleus (TRN),  $r$ . The basal ganglia (BG) contains two inhibitory populations within the striatum, one expressing the D1 dopamine receptor,  $d_1$ , and one expressing the D2 dopamine receptor,  $d_2$ . The striatum projects to two inhibitory populations, the globus pallidus

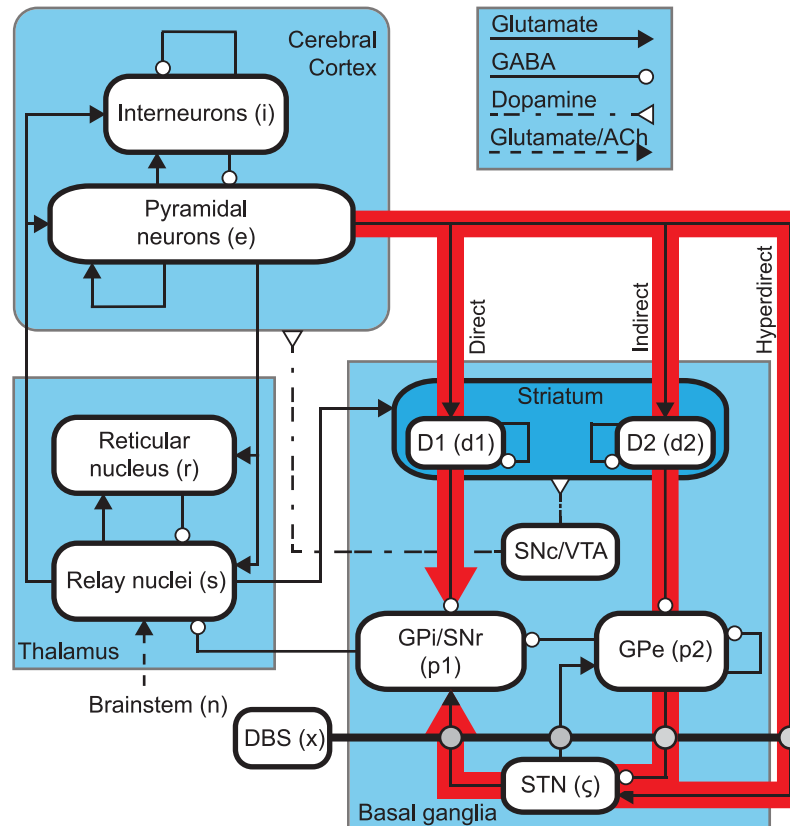

**Fig 1. Schematics of the corticothalamic-basal ganglia system.** Subscripts used to denote various neural populations are parenthesized. Arrowed lines denote neural connections and corresponding neurotransmitters, glutamate, GABA, dopamine, and acetylcholine (ACh). The population abbreviations are discussed in the Materials and Methods section. Red arrows highlight three key pathways through the basal ganglia.

<https://doi.org/10.1371/journal.pcbi.1006217.g001>

pars externa,  $p_2$ , and a population representing the globus pallidus pars interna and substantia nigra pars reticulata,  $p_1$ . The subthalamic nucleus (STN) is represented by an excitatory population,  $\zeta$ . Finally, deep brain stimulation is defined as an input source,  $x$ , which is coupled to STN as well as to its projection sites. This is discussed in detail in a later section. The substantia nigra pars compacta (SNc) and ventral tegmental area (VTA) are not explicitly defined as a population within the model, however, they are included in Fig 1 as an indication of the neural pathways affected by dopamine.

### Firing rates

The mean firing rate,  $Q_a(\mathbf{r}, t)$ , of a neural population can be approximately related to its mean membrane potential,  $V_a(\mathbf{r}, t)$ , by [66, 67]

$$Q_a(\mathbf{r}, t) = S_a[V_a(\mathbf{r}, t)], \tag{1}$$

$$= \frac{Q_a^{\max}}{1 + \exp[-\{V_a(\mathbf{r}, t) - \theta_a\}/\sigma']}. \tag{2}$$

where Eqs (1) & (2) define the sigmoidal mapping function  $S_a$ ,  $Q_a^{\max}$  is the maximal firing rate,  $V_a$  is the average membrane potential relative to resting,  $\theta_a$  is the mean neural firing threshold, and  $\sigma'/\sqrt{3}$  is the standard deviation of this threshold.

### Axonal propagation

A number of experimental studies have revealed waves of neural activity spreading across the cortex [68, 49, 69, 70], which have been analyzed theoretically [71, 72, 73, 51, 74, 75, 52, 58]. This propagating activity is represented as a field of mean spike rates in axons,  $\phi_a$ . A population  $a$ , with a mean firing rate  $Q_a$ , is related to  $\phi_a$  by the damped wave equation

$$D_a(\mathbf{r}, t)\phi_a(\mathbf{r}, t) = Q_a(\mathbf{r}, t), \tag{3}$$

where

$$D_a(\mathbf{r}, t) = \frac{1}{\gamma_a^2} \frac{\partial^2}{\partial t^2} + \frac{2}{\gamma_a} \frac{\partial}{\partial t} + 1 - r_a^2 \nabla^2. \tag{4}$$

Here,  $\gamma_a = v_a/r_a$  represents the damping rate, where  $v_a$  is the propagation velocity in axons, and  $r_a$  is the characteristic axonal length for the population. The propagation of these waves is facilitated primarily by the relatively long-range white matter axons of excitatory cortical pyramidal neurons. Later in our model the simplifying local interaction approximation  $r_b \approx 0$  is made for  $b = i, r, s, d_1, d_2, p_1, p_2, \zeta$  due to the short ranges of the corresponding axons which implies  $\phi_b(\mathbf{r}, t) = Q_b(\mathbf{r}, t)$  for these populations [52, 57, 54, 55, 76, 77].

### Synaptodendritic and somatic response

The mean soma potential  $V_a$  of a population  $a$  at position  $\mathbf{r}$  and time  $t$  is given by sum of the postsynaptic potentials (PSPs):

$$V_a(\mathbf{r}, t) = \sum_b V_{ab}(\mathbf{r}, t), \tag{5}$$

where  $V_{ab}(\mathbf{r}, t)$  is the postsynaptic potential generated by projections arriving at population  $a$  from population  $b$ . The influence of incoming spikes to population  $a$  from population  $b$  is weighted by a connection strength parameter,  $v_{ab} = N_{ab}s_{ab}$ , where  $N_{ab}$  is the mean number of connections between the two populations and  $s_{ab}$  is the mean strength of response in neuron  $a$  to a single spike from neuron  $b$ . The postsynaptic potential response in the dendrite is given by

$$D_{\alpha\beta} V_{ab}(\mathbf{r}, t) = v_{ab}(\mathbf{r}, t)\phi_{ab}(\mathbf{r}, t - \tau_{ab}), \tag{6}$$

where  $\tau_{ab}$  is the average axonal delay for the transmission of signals to population  $a$  from population  $b$ . The operator  $D_{\alpha\beta}$  describes the time evolution of  $V_{ab}$  in response to synaptic input, and is given by

$$D_{\alpha\beta} = \frac{1}{\alpha\beta} \frac{d^2}{dt^2} + \left(\frac{1}{\alpha} + \frac{1}{\beta}\right) \frac{d}{dt} + 1. \tag{7}$$

where  $\beta$  and  $\alpha$  are the overall rise and decay response rates to the synaptodendritic and soma dynamics.

### Steady states

It has been shown that nominal brain activity is well characterized by perturbations about a mean value [55]. Hence, we first find the time independent states of the CTBG system. Following the approach of previous neural field models, excitatory and inhibitory synapses in the cortex are assumed proportional to the numbers of neurons [50, 78]. This random connectivity approximation results in  $v_{ee} = v_{ie}$ ,  $v_{ei} = v_{ii}$ , and  $v_{es} = v_{is}$ , which implies  $V_e = V_i$  and  $Q_e = Q_i$ .

Inhibitory population variables can then be expressed in terms of excitatory quantities and are thus not neglected even though they do not appear explicitly below.

The steady states are obtained by setting all time derivatives to zero in Eqs (3), (4) and (6). Using the connectivity shown in Fig 1, and excluding DBS, Eqs (5) and (6) give

$$V_e^{(0)} = (v_{ee} + v_{ei})\phi_e^{(0)} + v_{es}\phi_s^{(0)}, \tag{8}$$

$$V_r^{(0)} = v_{re}\phi_e^{(0)} + v_{rs}\phi_s^{(0)}, \tag{9}$$

$$V_s^{(0)} = v_{se}\phi_e^{(0)} + v_{sr}\phi_r^{(0)} + v_{sp_1}\phi_{p_1}^{(0)} + v_{sn}\phi_n^{(0)}, \tag{10}$$

$$V_{d_1}^{(0)} = v_{d_1e}\phi_e^{(0)} + v_{d_1s}\phi_s^{(0)} + v_{d_1d_1}\phi_{d_1}^{(0)}, \tag{11}$$

$$V_{d_2}^{(0)} = v_{d_2e}\phi_e^{(0)} + v_{d_2s}\phi_s^{(0)} + v_{d_2d_2}\phi_{d_2}^{(0)}, \tag{12}$$

$$V_{p_1}^{(0)} = v_{p_1\zeta}\phi_\zeta^{(0)} + v_{p_1d_1}\phi_{d_1}^{(0)} + v_{p_1p_2}\phi_{p_2}^{(0)}, \tag{13}$$

$$V_{p_2}^{(0)} = v_{p_2\zeta}\phi_\zeta^{(0)} + v_{p_2d_2}\phi_{d_2}^{(0)} + v_{p_2p_2}\phi_{p_2}^{(0)}, \tag{14}$$

$$V_\zeta^{(0)} = v_{\zeta e}\phi_e^{(0)} + v_{\zeta p_2}\phi_{p_2}^{(0)}. \tag{15}$$

The system's steady states then can be determined by considering the simultaneous zeros of the five functions

$$F(\phi_e) = \phi_e - S_e[(v_{ee} + v_{ei})\phi_e + v_{es}\phi_s], \tag{16}$$

$$F(\phi_s) = \phi_s - S_s[v_{se}\phi_e + v_{sr}\phi_r + v_{sp_1}\phi_{p_1} + v_{sn}\phi_n], \tag{17}$$

$$F(\phi_{d_1}) = \phi_{d_1} - S_{d_1}[v_{d_1e}\phi_e + v_{d_1s}\phi_s + v_{d_1d_1}\phi_{d_1}], \tag{18}$$

$$F(\phi_{d_2}) = \phi_{d_2} - S_{d_2}[v_{d_2e}\phi_e + v_{d_2s}\phi_s + v_{d_2d_2}\phi_{d_2}], \tag{19}$$

$$F(\phi_{p_2}) = \phi_{p_2} - S_{p_2}[v_{p_2d_2}\phi_{d_2} + v_{p_2p_2}\phi_{p_2} + v_{p_2\zeta}\phi_\zeta]. \tag{20}$$

where  $\phi_r$ ,  $\phi_{p_1}$ , and  $\phi_\zeta$  can be determined from Eqs (9), (13) and (15), respectively, in conjunction with Eq (1). The roots of Eqs (16)–(20) are computed numerically using the MATLAB function `fsolve()` with a tolerance of  $10^{-15}$  V.

### Resonances and gains

A linearized form of the CTBG model can be used to derive the transfer function of the system [63, 64, 65]. This is a function of the internal gains of the system, which represent the additional activity generated in postsynaptic nuclei per additional unit input activity from presynaptic nuclei, and are [53, 55]

$$G_{ab} = \rho_a v_{ab} \tag{21}$$

where

$$\rho_a = \left. \frac{dQ_a}{dV_a} \right|_{V_a^{(0)}} = \frac{\phi_a^{(0)}}{\sigma'} \left[ 1 - \frac{\phi_a^{(0)}}{Q_a^{\max}} \right]. \quad (22)$$

### Numerical simulations

All numerical simulations of the CTBG neural field model in this work are performed using the NFTsim code package detailed by [79]. This package is used to solve Eqs (1)–(7) numerically for the spatially uniform case where the  $\nabla^2$  in (4) is zero. The solutions to these delay differential equations are found using a standard forth-order Runge-Kutta integration method with a time step of  $10^{-4}$  s.

Nominal brain states have been found to exist near stable fixed points [55]. Hence, all simulations in this work are performed with the system initialized to the low firing steady state found in the previous section using the parameters given in Table 1, unless otherwise specified.

### Modeling DBS

Many different stimulus protocols have been used in clinical DBS—with different pulse geometries (i.e. sinusoidal or square-wave), signal amplitudes, stimulation frequencies, and/or transient stimulation phases, followed by varied quiescent periods.

In this work we seek a general formulation of a neural populations response to fluctuations in an applied electric field that will allow for the effects of various stimulus protocols to be determined.

The minimum current necessary to stimulate a given neural element with a long stimulus duration is called the rheobase [80]. The minimum length of time required to activate a given neural element using a stimulus amplitude twice as large as the rheobase is called the chronaxie. Extracellular stimulation experiments have demonstrated a chronaxie time for the myelinated axons which is substantially smaller than the chronaxies of the cell body and dendrites [7, 81, 82]. Hence, our key assumption is that the net effect of fluctuations of an applied electric field is a stimulation of voltage-gated ion channels that induces transmembrane current flow predominantly in both afferent and efferent axons of a subset of neurons within the stimulated population.

A mean-field model has recently been used to describe population effects of transcranial magnetic stimulation [83, 84]. A modification of this approach is used by defining an external pulse rate  $\phi_x(t)$  that consists of a train of pulses with a width  $t_{\text{width}}$  similar to time series used in DBS treatments. The applied stimulation is then given by

$$\phi_x(t) = \phi_x^{\max} \sum_j R(t - t_j^p), \quad (23)$$

where  $\phi_x^{\max}$  is the pulse amplitude and  $R(t)$  is a top-hat function of width  $t_{\text{width}}$ ,

$$R(t) = \begin{cases} 1, & 0 < t < t_{\text{width}}, \\ 0, & \text{otherwise.} \end{cases} \quad (24)$$

The time-integral of  $\phi_x(t)$ , Eq (23), over the pulse width  $t_{\text{width}}$  is the average number of additional spikes generated in the target axon by the applied stimulation. The external stimulus is then coupled to a target population  $a$  via a connection parameter  $v_{ax}$  with a pulse frequency  $f_{\text{stim}}$ . In the case of STN-DBS,  $\phi_x(t)$  is coupled to the STN, but also to the GPi and GPe populations as an approximation of the activation of axons terminals near the stimulation site.

Table 1. Nominal parkinsonian parameters adapted from [63].

| Quantity                                 | Value | Unit     |
|------------------------------------------|-------|----------|
| $r$                                      | 80    | mm       |
| $\sigma'$                                | 3.3   | mV       |
| $\phi_n^{(0)}$                           | 1     | $s^{-1}$ |
| $\gamma_e$                               | 116   | $s^{-1}$ |
| $\alpha$                                 | 50    | $s^{-1}$ |
| $\beta$                                  | 200   | $s^{-1}$ |
| $\tau_{re}, \tau_{se}$                   | 45    | ms       |
| $\tau_{es}$                              | 35    | ms       |
| $Q_e^{\max}, Q_r^{\max}, Q_{p_2}^{\max}$ | 300   | $s^{-1}$ |
| $Q_{d_1}^{\max}, Q_{d_2}^{\max}$         | 65    | $s^{-1}$ |
| $Q_{p_1}^{\max}$                         | 250   | $s^{-1}$ |
| $Q_{\zeta}^{\max}$                       | 500   | $s^{-1}$ |
| $\theta_e$                               | 14    | mV       |
| $\theta_r, \theta_s$                     | 13    | mV       |
| $\theta_{d_1}, \theta_{d_2}$             | 19    | mV       |
| $\theta_{p_1}, \theta_{\zeta}$           | 10    | mV       |
| $\theta_{p_2}$                           | 9     | mV       |
| $v_{ee}$                                 | 1.2   | mV s     |
| $v_{ei}$                                 | -1.5  | mV s     |
| $v_{es}$                                 | 1.1   | mV s     |
| $v_{re}$                                 | 0.1   | mV s     |
| $v_{rs}$                                 | 0.1   | mV s     |
| $v_{se}$                                 | 1.5   | mV s     |
| $v_{sr}$                                 | -0.1  | mV s     |
| $v_{sp_1}$                               | -0.2  | mV s     |
| $v_{sn}$                                 | 0.5   | mV s     |
| $v_{d_1e}$                               | 0.1   | mV s     |
| $v_{d_1s}$                               | 1     | mV s     |
| $v_{d_1d_1}$                             | -0.02 | mV s     |
| $v_{d_2e}$                               | 0.1   | mV s     |
| $v_{d_2s}$                               | 0.1   | mV s     |
| $v_{d_2d_2}$                             | -0.02 | mV s     |
| $v_{p_1d_1}$                             | -0.2  | mV s     |
| $v_{p_1p_2}$                             | -0.02 | mV s     |
| $v_{p_1\zeta}$                           | 1     | mV s     |
| $v_{p_2d_2}$                             | -0.8  | mV s     |
| $v_{p_2p_2}$                             | -0.2  | mV s     |
| $v_{p_2\zeta}$                           | 2.4   | mV s     |
| $v_{\zeta e}$                            | 1.3   | mV s     |
| $v_{\zeta p_2}$                          | -0.2  | mV s     |

<https://doi.org/10.1371/journal.pcbi.1006217.t001>

## Results

### Effects of stimulation in the model

An afferent spike rate to any population in the CTBG system induces a change in the dendritic membrane potential of that population with a time evolution described by Eq (6). Depending



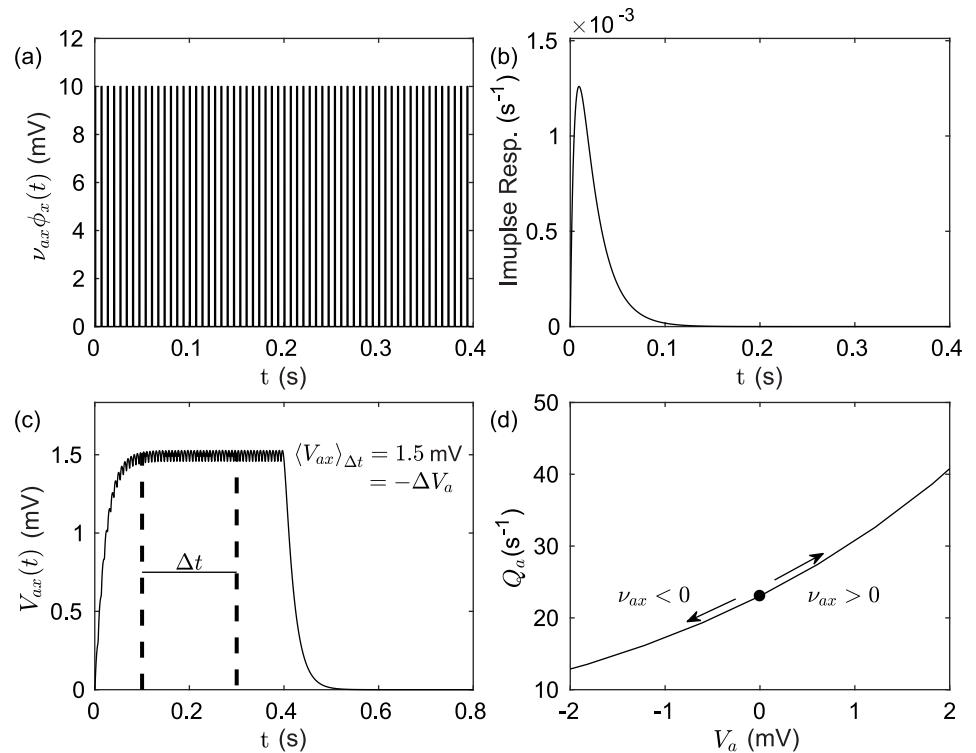

**Fig 2. Effects of external pulse train stimulus on population activity.** (a) An example evoked response time series for an external pulse frequency  $f_{stim} = 130$  Hz, pulse width  $t_{width} = 130$  ms, and coupling strength  $v_{ax} = 10$  mV s. (b) Impulse response for a unit input at  $t = 0$  with decay and rise rate parameters,  $\beta = 200$  s<sup>-1</sup> and  $\alpha = 50$  s<sup>-1</sup>, respectively. (c) Evoked response potential of a given population to the external stimulus represented by the convolution of the impulse response with the stimulus time series. (d) The mean effect of a voltage perturbation evoked by an external stimulus on the distribution of firing rates with a population. Example parameters used are  $Q^{max} = 500$  s<sup>-1</sup>,  $\sigma' = 3.3$  mm, and  $\theta_a = 10$  mV.

<https://doi.org/10.1371/journal.pcbi.1006217.g002>

on the connection type, this change may be positive (excitatory) or negative (inhibitory). Each inter-population connection then produces a change in voltage which is integrated at the soma, as described by Eq (5).

In the case of DBS,  $\phi_x(t)$ , the mean voltage perturbation observed at the soma of neurons, can be shown by numerically convolving the stimulus time series with the normalized impulse response function given in differential form in Eq (7). Fig 2 shows the evoked response potential generated by a stimulus pulse train, which resembles typical 130 Hz clinical stimulation, and the resulting perturbation to the target population firing rate. The temporal parameters used for the stimulus in Fig 2(a) prescribes an inter-pulse quiescent period of about 7 ms. It can be seen in Fig 2(b) that during this period the impulse response function only decays to about 80% of its maximum value. Fig 2(c) can then be understood as showing small oscillations in the evoked response potential about a constant mean perturbation that results from stimulus time scales which are shorter than population response time scales. The evoked response potential is integrated at the soma of the target population along with intrinsic afferents from other populations within the network. A constant perturbation applied to the soma potential of a population changes its mean firing rate by moving the population along its corresponding sigmoidal response function, (1). Fig 2(d) demonstrates that in the case of inhibition mean soma potentials correspond to lower mean firing rates when compared with

unperturbed values. In the case of excitation, the effect is reversed with mean soma potentials corresponding to higher mean firing rates when compared with the unperturbed values.

### Parkinsonian oscillations

Enhanced activity at  $\sim 13$ -30 Hz is a common feature of Parkinson's disease patient LFP recordings in the GPi and STN which has been correlated with symptom severity [43, 44, 42]. Recent works have suggested that the neural circuit formed between the GPe and STN can generate these beta oscillations [45, 46] and that excitatory inputs from the cortex may facilitate their amplification [47].

Table 1 contains parameter estimates for parkinsonian states of the CTBG model adapted from [63]. Changes to the [63] connection strength estimates were made in order to explore the effects of a dominant GPe-STN-GPe pathway.

In Fig 3(a) and 3(b), power spectra of the STN firing rate demonstrate enhanced activity at  $\sim 26$  Hz, as well as at  $\sim 6$  Hz. By increasing STN-GPe coupling  $v_{p2\zeta}$ , damping of the GPe-STN-GPe loop is weakened and results in a strengthened hyperdirect pathway. Together these loops drive 26 Hz oscillations in the STN firing rate which project to the GPi population through STN efferents and then on to thalamic and cortical populations.

The 6 Hz STN oscillations observed in Fig 3(b) are weaker than the 26 Hz beta oscillations. However, the power spectrum for the cortical population shows an opposite relationship with stronger 6 Hz activity than the 26 Hz beta oscillations. This is an interesting result because tremor oscillations in PD patients measured via electromyography (EMG) are typically about 6 Hz and these correlate well with motor cortical activity measured via electroencephalography (EEG) [85]. However, STN LFP recordings about the 4–6 Hz tremor frequency have yet to be demonstrated as a reliable source for tremor detection [86]. Furthermore, other studies have suggested the thalamo-basal ganglia circuit as the origin of tremor oscillations [87].

The model configuration required to produce a dominant GPe-STN-GPe loop resonance involves both an increase in STN-GPe coupling  $v_{p2\zeta}$ , with respect to previous parameter estimates [63], as well as an increase in cortico-STN coupling  $v_{\zeta e}$ . This is consistent the findings of a recent conductance-based modelling study where cortical inputs amplified parkinsonian oscillations generated by the subthalamo-pallidal circuit [47], although the frequencies observed in that study were lower, 8–14 Hz, and represent dopamine depleted states of primates [45].

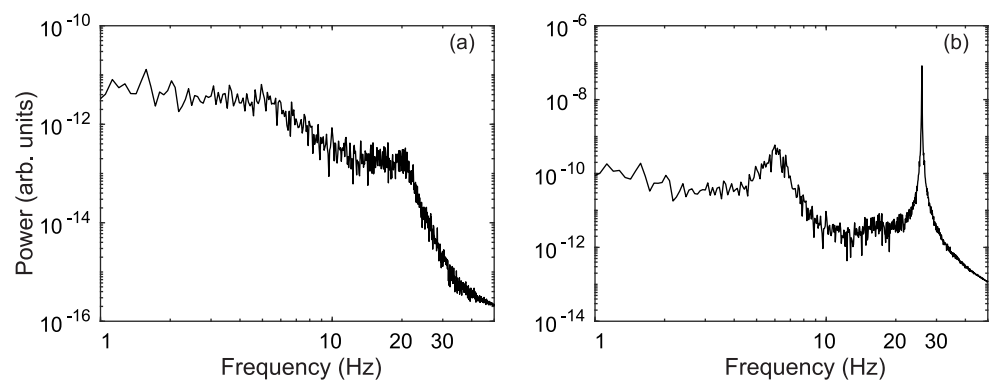

**Fig 3. Parkinsonian activity in the STN.** (a) Power spectrum of STN firing rate  $\phi_{\zeta}$  for  $v_{p2\zeta} = 1.8$  mVs. (b) Power spectrum of STN firing rate  $\phi_{\zeta}$  for  $v_{p2\zeta} = 2.4$  mVs.

<https://doi.org/10.1371/journal.pcbi.1006217.g003>

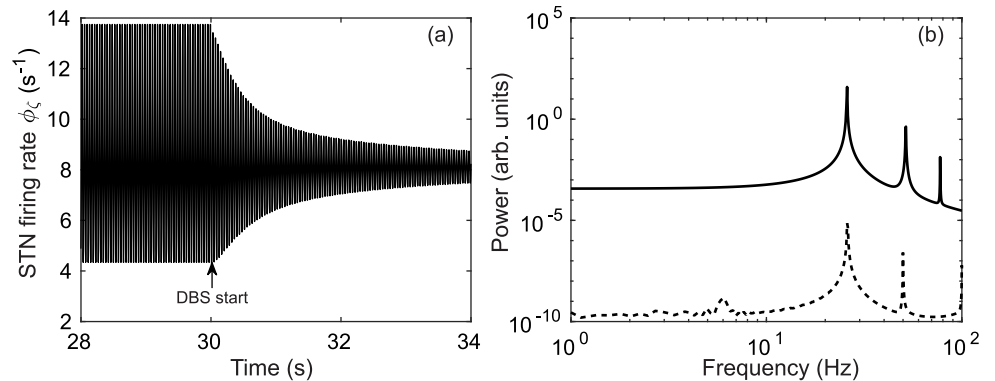

**Fig 4. Suppression of parkinsonian beta activity for a 150 Hz external stimulus applied at  $t = 30$  s with  $v_{\zeta,x} = -1.2$  mVs and  $v_{p1,x}, v_{p1,x} = 1.2$  mVs.** (a) Time series of STN firing rate  $\phi_{\zeta}$  with DBS stimulus applied at  $t = 30$  s. (b) Power spectrum of STN firing rate  $\phi_{\zeta}$  before DBS application using the time window  $t = 10-30$  s (solid), and during DBS application using a time window  $t = 30-50$  s (dashed).

<https://doi.org/10.1371/journal.pcbi.1006217.g004>

### Suppression of PD oscillations by DBS

In this section the CTBG system is numerically simulated using parkinsonian parameters defined in Table 1. These parameters yield strong GPe-STN and hyperdirect loop resonances, which results in large amplitude  $\sim 26$  Hz oscillations in STN activity.

In Fig 4(a) parkinsonian  $\sim 26$  Hz STN activity is simulated for 30 s and then 150 Hz DBS is applied. Following the application of this stimulation, a damping of the  $\sim 26$  Hz oscillation is observed. A comparison of STN power spectrums pre-stimulus and during stimulation is given in Fig 4(b) and this shows peak power is reduced as a result of DBS.

Fig 5(a) demonstrates that increasing DBS pulse frequency strengthens the suppression of 13-30 Hz STN activity. As discussed in previous sections, coupling a DBS input to any population in the model results in an effective constant perturbation to the membrane potential  $V_a$  of that population. Because DBS is coupled to the STN, GPe, and GPi populations via  $v_{\zeta,x} = -1.2$  mVs and  $v_{p1,x}, v_{p1,x} = 1.2$  mVs, each corresponding mean membrane potential is perturbed by  $|\Delta V|$ . This perturbation is  $-\Delta V$  (inhibitory) for the STN population, and  $+\Delta V$  (excitatory) for

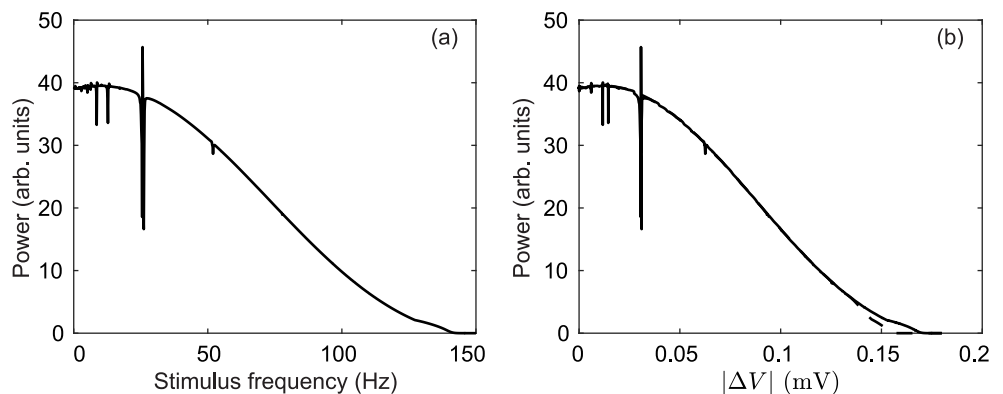

**Fig 5. Peak power of STN firing rate  $\phi_{\zeta}$  during a 40 s simulation within the frequency band  $f = 20-30$  Hz using a time window  $t = 20-40$  s.** (a) Dependence of peak  $f = 20-30$  Hz power on DBS pulse frequency with  $v_{\zeta,x} = -1.2$  mVs and  $v_{p1,x}, v_{p2,x} = 1.2$  mVs. (b) Change in peak  $f = 20-30$  Hz power by a direct constant perturbation to the soma potential (dashed) and by an indirect perturbation resulting from an oscillating DBS input (solid), as described in Fig 2. For each point  $V_{\zeta} = V_{\zeta} + \Delta V$ ,  $V_{p1} = V_{p1} - \Delta V$ , and  $V_{p2} = V_{p2} - \Delta V$ .

<https://doi.org/10.1371/journal.pcbi.1006217.g005>

the GPi and GPe populations. In Fig 5(b) we compare power suppression at 13–30 Hz for two cases: In the first case, a direct constant perturbation is made to the membrane potentials of the STN, GPi, and GPe populations. In the second case, the stimulus input used to produce Fig 5(a) is convolved with an impulse response function, as discussed in a previous section. This allows the DBS input to be approximately represented as a constant perturbation to the membrane potential of a given population. Fig 5(b) shows how peak power between 13-30 Hz is effected by directly perturbing the mean membrane potential for the STN, GPi, and GPe populations relative to indirectly perturbing them with an oscillating DBS input. The suppression of pathological beta activity by DBS in our model is then largely attributable to this effective perturbation to the mean membrane potential.

Fig 5(a) and 5(b) also show constructive wave interactions for stimulus pulse frequencies equal to the 26 Hz beta oscillation and destructive interactions near the beta peak and its harmonic (52 Hz) and subharmonic (13 Hz). Studies have shown low-frequency stimulation may worsen PD motor symptoms [88, 89] as well as improve them [90].

The dependence of key network gains on the DBS pulse frequency is shown in Fig 6(a) and 6(b). The parkinsonian parameters define a pathologically strong STN-GPe-STN loop gain as well as a strong hyperdirect pathway. As the pulse frequency of the DBS inputs increases, so too does the net inhibition in the system. This is due to DBS inputs activating the inhibitory pallidal populations (GPe and GPi) more strongly. In contrast, the remaining DBS input inhibits the STN population, which is critical to the generation of a ~ 26 Hz resonance.

It is important to note that the same suppressive effect can be achieved for a lower stimulus frequency if the stimulus amplitude is correspondingly increased. In DBS treatments, using larger signal amplitudes has the potential to increase the area directly affected by the applied stimulation, possibly incorporating non-motor projecting segments of the STN or even adjacent populations. Our results demonstrate that a high stimulus pulse frequency ( $f_{stim} > 100$  Hz) is necessary for beta suppression when the signal amplitude is constrained to be small relative to other STN inputs, e.g., for the Table 1 parameters DBS constitutes ~ 6% of the connection weighted activity arriving at the STN over a time interval greater than several stimulus pulse widths.

Fig 7 shows the power spectrum of the STN firing rate time series as a function of DBS pulse frequency. Strong oscillations are seen at ~ 26 Hz and its second harmonic ~ 52 Hz. When the stimulus pulse frequency reaches about 140 Hz the ~ 26 Hz power decreases by

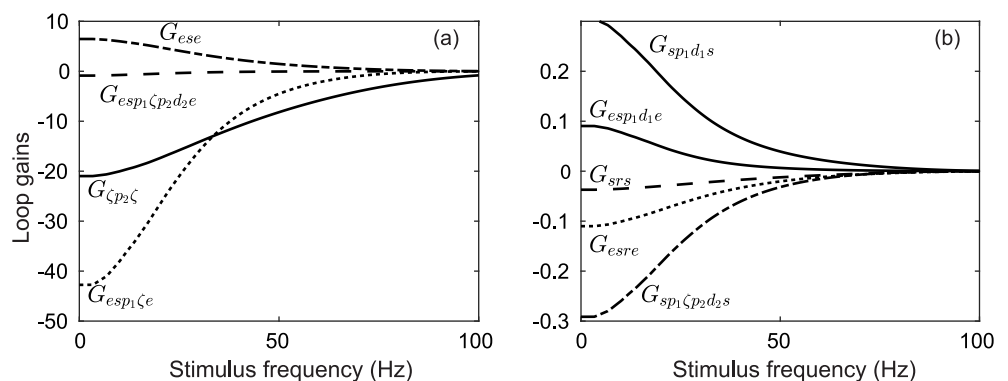

**Fig 6. Perturbation of key CTBG loop gains during DBS with  $v_{\zeta x} = -1.2$  mVs,  $v_{p_1 x}$ ,  $v_{p_1 x} = 1.2$  mVs, and all other parameters as defined in Table 1.** (a) Dependence of loop gains on the DBS pulse frequency. (b) Dependence of loop gains on the DBS pulse frequency.

<https://doi.org/10.1371/journal.pcbi.1006217.g006>

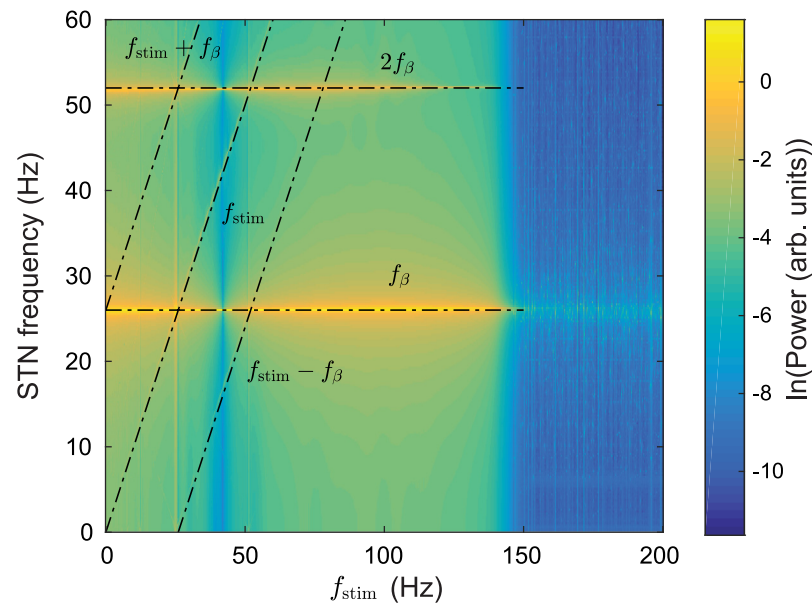

**Fig 7. Power spectrum of parkinsonian STN activity as a function of DBS pulse frequency.** A simulation of 40 s is used with  $v_{c,x} = -1.2$  mVs and  $v_{p1,x}, v_{p2,x} = 1.2$  mVs and a power spectrum of the STN firing rate is calculated over the time window  $t = 20-40$  s.

<https://doi.org/10.1371/journal.pcbi.1006217.g007>

several orders of magnitude. Overall power within the 0–60 Hz frequency band also decreases and is redistributed to higher frequencies.

Additionally, Fig 7 shows peaks at the stimulus frequency  $f_{stim}$  (1:1) and also at its harmonics  $f_{stim}(N:1)$ , however, the harmonics are much weaker and not clearly discernible in this plot.

Nonlinear wave interactions have previously been demonstrated in a neural field model of the corticothalamic system [91] which shows good agreement with human EEG studies [92]. In [91], a periodic nonlinear input was used to drive the CT system and resulted in nonlinear interactions between the drive frequency and an intrinsic alpha oscillation. Spectral peaks were found at frequencies equal to the sum and difference of the drive frequency and the intrinsic alpha frequency,  $f_{\pm} = |f_{stim} \pm f_{\alpha}|$ , as well their respective harmonics. Our model also demonstrates these nonlinear interactions. In Fig 7, spectral peaks are seen at the sum and difference of the stimulus pulse frequency and the beta frequency  $f_{\pm} = |f_{stim} \pm f_{\beta}|$  where  $f_{\beta} = 26$  Hz. These nonlinear interactions are much more distinct in Fig 8 with peaks seen at  $f_{\pm} = -f_{stim} + 2f_{\beta}$ ,  $2f_{stim} - f_{\beta}$ , and  $-2f_{stim} + 3f_{\beta}$ . Additionally, Fig 8 demonstrates an entrainment of STN activity as a result of DBS inputs. The intrinsic parkinsonian beta peak is shifted to match the stimulus pulse frequency within the 25.5–26.2 Hz range. This result is consistent with experimental findings in human PD studies where a local entrainment of neural activity was observed during GPi-DBS [23].

## Discussion

In this work we have developed a novel description of deep brain stimulation and incorporated it into a neural field model of the corticothalamic-basal ganglia system. The model has enabled us to explore generative mechanisms for the pathological beta band activity observed in Parkinson's disease and the influences of DBS on these oscillations. The main results of the paper are as follows:

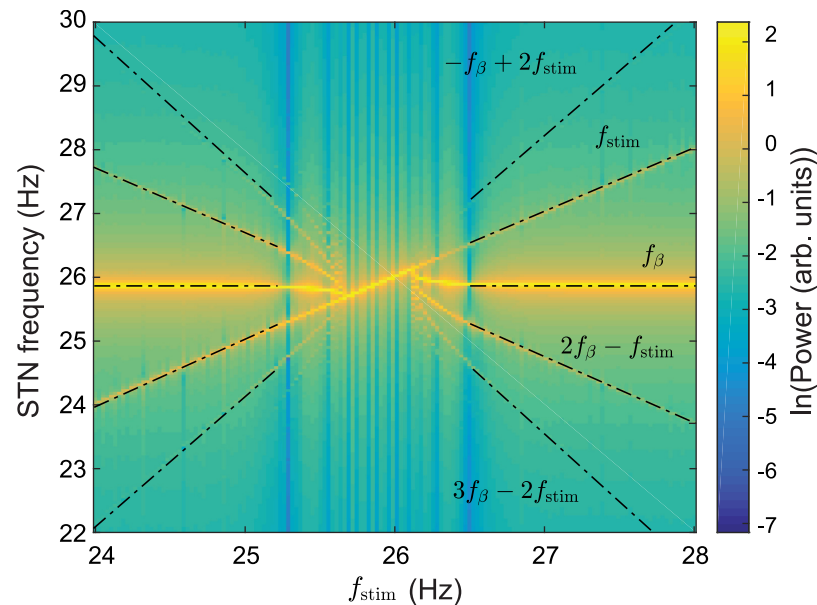

**Fig 8. Power spectrum of parkinsonian STN activity as a function of DBS pulse frequency with  $f_{stim} = 24\text{--}28$  Hz.** A simulation of 40 s is used with  $v_{c,x} = -1.2$  mVs and  $v_{p1,x}, v_{p2,x} = 1.2$  mVs and the power spectrum of the STN firing rate is calculated over the time window  $t = 20\text{--}40$  s.

<https://doi.org/10.1371/journal.pcbi.1006217.g008>

1. A general description of deep brain stimulation was developed and applied to a neural field model of the CTBG system originally proposed by [63] and which is further developed in this work. The model provides a framework for exploring characteristic states of Parkinson's disease and the influence of DBS protocols on these states.
2. STN-DBS was found to produce an effective constant perturbation to the membrane potentials of the STN and pallidal populations, which have network-wide effects on stationary states and interpopulation connection gains. The impact these perturbations have on the system gains and population activity is dependent on the prestimulus state of the system. This implies that identical stimulation protocols applied to the same region of the brain in two individuals may have distinct impacts on brain activity. In the case of PD, patient specific variations of the pathophysiology may contribute to diverse stimulus response. Thus, it is essential that prestimulus brain states be better understood in order to improve the efficacy of DBS treatments and future uses.
3. Beta activity around 26 Hz was generated via a pathologically strong subthalamo-pallidal-subthalamic loop which resulted in a dominant indirect pathway through the basal ganglia. The beta oscillations are consistent with coherence peaks between the subthalamic nucleus and globus pallidus observed experimentally [30, 37]. The dependence of these parkinsonian oscillations on the STN-GPe-STN pathway is also consistent with the results of a reduced CTBG model [46] and experiments with monkeys rendered parkinsonian [45].
4. It was found that cortical inputs to the STN population can amplify the pathological beta activity which has been suggested by experiments using antagonists to block cortical projections to the STN [45]. This amplification has also been demonstrated in a conductance-based modeling study using  $\sim 250$  STN and GPe neurons [47]. Our model generalizes this result by incorporating realistic inputs from the striatum to the pallidal populations, as well as direct excitatory inputs from the cortex to the STN.



5. 6 Hz oscillations were observed in STN activity which projected more strongly to the cortical populations than the beta activity and are the result of a pathologically large cortico-basal ganglia-thalamo-cortical pathway. The result provides a possible generative mechanism for 6 Hz tremor oscillations in PD patients which correlate well with motor cortical activity [85]. However, STN LFP recordings about the 4–6 Hz tremor frequency have yet to be demonstrated as a reliable source for tremor detection [86] and studies have suggested the thalamo-basal ganglia circuit may be the origin of tremor oscillations [87].
6. High pulse frequency (> 140 Hz) DBS of the STN was effective in suppressing pathological 26 Hz activity characteristic of Parkinson's disease. The suppressive effect was shown to result from a perturbation to the mean membrane potential of the STN, and the external and internal segments on the globus pallidus. Low frequency stimulation in human PD has so far failed to show optimal symptom control [88, 93]. This could be due to an insufficient amount of DBS evoked activity required for damping the resonance responsible for pathological beta activity. Larger stimulus amplitudes result in a larger volume of directly influenced neurons, potentially extending beyond the motor related regions of the STN, and even adjacent brain regions. Therefore, in order to achieve the necessary levels of evoked activity for damping the system resonance, higher pulse frequencies are required.
7. Nonlinear interactions were found to occur between the parkinsonian beta resonance and stimulus pulse frequency, which resulted in an entrainment of STN activity. This supports experimental findings in human PD studies where a local entrainment of neural activity was observed during GPi-DBS [23].
8. Stimulation frequencies equal to the beta frequency peak resulted in enhanced beta power in STN activity via a constructive wave interaction. Studies have suggested beta band stimulation may worsen PD motor symptoms [88] while 60–80 Hz stimulation may improve them [90].

Overall, our work provides insights into the generative mechanisms of pathological oscillations in human Parkinson's disease and the population level effects of deep brain stimulation upon these oscillations. Furthermore, the model provides a framework for predicting effective stimulus protocols systematically rather than by trial and error, as has been the case to date.

Closed-loop adaptive DBS systems use feedback from local field potential measurements made via the implanted stimulation electrode to modulate stimulus protocols [94]. Our model could be used in conjunction with an adaptive DBS system to increase the efficacy of clinical treatments. Cortical and subthalamic firing rate spectra in this model could be fitted to EEG and LFP spectra during an on-off DBS treatment cycle. The change in spectra corresponds to specific variable changes in the model and the trajectory of these changes could then be used as a detection method for parkinsonian states that are specific to the patient.

Several studies have observed antidromic activation as a result of deep brain stimulation [95], and activation of pallido-thalamic fibers during STN-DBS [96], which could be included in future generations of the model.

## Author Contributions

**Conceptualization:** Eli J. Müller.

**Formal analysis:** Eli J. Müller.

**Investigation:** Eli J. Müller.

**Methodology:** Eli J. Müller, Peter A. Robinson.

**Resources:** Peter A. Robinson.

**Software:** Eli J. Müller.

**Supervision:** Peter A. Robinson.

**Validation:** Eli J. Müller, Peter A. Robinson.

**Visualization:** Eli J. Müller.

**Writing – original draft:** Eli J. Müller.

**Writing – review & editing:** Eli J. Müller, Peter A. Robinson.

## References

1. Benabid AL, Pollak P, Gao D, Hoffmann D, Limousin P, Gay E, et al. Chronic electrical stimulation of the ventralis intermedius nucleus of the thalamus as a treatment of movement disorders. *J Neurosurg*. 1996; 84(2):203–214. <https://doi.org/10.3171/jns.1996.84.2.0203> PMID: 8592222
2. Moro E, Esselink R, Xie J, Hommel M, Benabid A, Pollak P. The impact on Parkinson's disease of electrical parameter settings in STN stimulation. *Neurol*. 2002; 59:706–713. <https://doi.org/10.1212/WNL.59.5.706>
3. Vidailhet M, Vercueil L, Houeto JL, Krystkowiak P, Benabid AL, Cornu P, et al. Bilateral deep-brain stimulation of the globus pallidus in primary generalized dystonia. *N Engl J Med*. 2005; 352:459–467. <https://doi.org/10.1056/NEJMoa042187> PMID: 15689584
4. Boon P, Vonck K, De Herdt V, Van Dycke A, Goethals M, Goossens L, et al. Deep brain stimulation in patients with refractory temporal lobe epilepsy. *Epilepsia*. 2007; 48:1551–1560. <https://doi.org/10.1111/j.1528-1167.2007.01005.x> PMID: 17726798
5. Figeé M, Luigjes J, Smolders R, Valencia-Alfonso CE, Van Wingen G, De Kwaasteniet B, et al. Deep brain stimulation restores frontostriatal network activity in obsessive-compulsive disorder. *Nat Neurosci*. 2013; 16(4):386–387. <https://doi.org/10.1038/nn.3344> PMID: 23434914
6. Chiken S, Nambu A. Mechanism of deep brain stimulation: inhibition, excitation, or disruption? *Neuroscientist*. 2016; 22:313–322. <https://doi.org/10.1177/1073858415581986> PMID: 25888630
7. Nowak L, Bullier J. Axons, but not cell bodies, are activated by electrical stimulation in cortical gray matter I. Evidence from chronaxie measurements. *Exp Brain Res*. 1998; 118:477–488. <https://doi.org/10.1007/s002210050304> PMID: 9504843
8. Åström M, Diczfalusy E, Martens H, Wårdell K. Relationship between neural activation and electric field distribution during deep brain stimulation. *IEEE Trans Biomed Eng*. 2015; 62:664–672. <https://doi.org/10.1109/TBME.2014.2363494> PMID: 25350910
9. Schmidt C, van Rienen U. Modeling the field distribution in deep brain stimulation: the influence of anisotropy of brain tissue. *IEEE Trans Biomed Eng*. 2012; 59:1583–1592. <https://doi.org/10.1109/TBME.2012.2189885> PMID: 22410323
10. Herrington TM, Cheng JJ, Eskandar EN. Mechanisms of deep brain stimulation. *J Neurophysiol*. 2015; 115:19–38. <https://doi.org/10.1152/jn.00281.2015> PMID: 26510756
11. Radman T, Ramos RL, Brumberg JC, Bikson M. Role of cortical cell type and morphology in subthreshold and suprathreshold uniform electric field stimulation in vitro. *Brain Stimulat*. 2009; 2:215–228. <https://doi.org/10.1016/j.brs.2009.03.007>
12. Heywood P, Gill S. Bilateral dorsolateral subthalamotomy for advanced Parkinson's disease. *The Lancet*. 1997; 350:1224. [https://doi.org/10.1016/S0140-6736\(05\)63455-1](https://doi.org/10.1016/S0140-6736(05)63455-1)
13. Bergman H, Wichmann T, DeLong MR, et al. Reversal of experimental parkinsonism by lesions of the subthalamic nucleus. *Science*. 1990; 249:1436–1438. <https://doi.org/10.1126/science.2402638> PMID: 2402638
14. Benazzouz A, Gao D, Ni Z, Piallat B, Bouali-Benazzouz R, Benabid A. Effect of high-frequency stimulation of the subthalamic nucleus on the neuronal activities of the substantia nigra pars reticulata and ventrolateral nucleus of the thalamus in the rat. *Neurosci*. 2000; 99:289–295. [https://doi.org/10.1016/S0306-4522\(00\)00199-8](https://doi.org/10.1016/S0306-4522(00)00199-8)
15. Meissner W, Leblois A, Hansel D, Bioulac B, Gross CE, Benazzouz A, et al. Subthalamic high frequency stimulation resets subthalamic firing and reduces abnormal oscillations. *Brain*. 2005; 128:2372–2382. <https://doi.org/10.1093/brain/awh616> PMID: 16123144



16. Dostrovsky J, Levy R, Wu J, Hutchison W, Tasker R, Lozano A. Microstimulation-induced inhibition of neuronal firing in human globus pallidus. *J Neurophysiol.* 2000; 84:570–574. <https://doi.org/10.1152/jn.2000.84.1.570> PMID: 10899228
17. Levy R, Lang AE, Dostrovsky JO, Pahapill P, Romas J, Saint-Cyr J, et al. Lidocaine and muscimol microinjections in subthalamic nucleus reverse Parkinsonian symptoms. *Brain.* 2001; 124:2105–2118. <https://doi.org/10.1093/brain/124.10.2105> PMID: 11571226
18. Welter ML, Houeto JL, Bonnet AM, Bejjani PB, Mesnage V, Dormont D, et al. Effects of high-frequency stimulation on subthalamic neuronal activity in parkinsonian patients. *Arch Neurol.* 2004; 61:89–96. <https://doi.org/10.1001/archneur.61.1.89> PMID: 14732625
19. Chiken S, Nambu A. High-frequency pallidal stimulation disrupts information flow through the pallidum by GABAergic inhibition. *J Neurosci.* 2013; 33:2268–2280. <https://doi.org/10.1523/JNEUROSCI.4144-11.2013> PMID: 23392658
20. Anderson ME, Postupna N, Ruffo M. Effects of high-frequency stimulation in the internal globus pallidus on the activity of thalamic neurons in the awake monkey. *J Neurophysiol.* 2003; 89:1150–1160. <https://doi.org/10.1152/jn.00475.2002> PMID: 12574488
21. Hashimoto T, Elder CM, Okun MS, Patrick SK, Vitek JL. Stimulation of the subthalamic nucleus changes the firing pattern of pallidal neurons. *J Neurosci.* 2003; 23:1916–1923. <https://doi.org/10.1523/JNEUROSCI.23-05-01916.2003> PMID: 12629196
22. Maurice N, Thierry AM, Glowinski J, Deniau JM. Spontaneous and evoked activity of substantia nigra pars reticulata neurons during high-frequency stimulation of the subthalamic nucleus. *J Neurosci.* 2003; 23:9929–9936. <https://doi.org/10.1523/JNEUROSCI.23-30-09929.2003> PMID: 14586023
23. Cleary DR, Raslan AM, Rubin JE, Bahgat D, Viswanathan A, Heinricher MM, et al. Deep brain stimulation entrains local neuronal firing in human globus pallidus internus. *J Neurophysiol.* 2013; 109:978–987. <https://doi.org/10.1152/jn.00420.2012> PMID: 23197451
24. McIntyre CC, Grill WM, Sherman DL, Thakor NV. Cellular effects of deep brain stimulation: model-based analysis of activation and inhibition. *J Neurophysiol.* 2004; 91:1457–1469. <https://doi.org/10.1152/jn.00989.2003> PMID: 14668299
25. Johnson MD, McIntyre CC. Quantifying the neural elements activated and inhibited by globus pallidus deep brain stimulation. *J Neurophysiol.* 2008; 100:2549–2563. <https://doi.org/10.1152/jn.90372.2008> PMID: 18768645
26. McIntyre CC, Mori S, Sherman DL, Thakor NV, Vitek JL. Electric field and stimulating influence generated by deep brain stimulation of the subthalamic nucleus. *Clin Neurophysiol.* 2004; 115:589–595. <https://doi.org/10.1016/j.clinph.2003.10.033> PMID: 15036055
27. Stefani A, Fedele E, Galati S, Pepicelli O, Frasca S, Pierantozzi M, et al. Subthalamic stimulation activates internal pallidus: evidence from cGMP microdialysis in PD patients. *Ann Neurol.* 2005; 57:448–452. <https://doi.org/10.1002/ana.20402> PMID: 15732123
28. Jankovic J. Parkinson's disease: clinical features and diagnosis. *J Neurol, Neurosurg & Psychiatry.* 2008; 79:368–376.
29. Zaltieri M, Longhena F, Pizzi M, Missale C, Spano P, Bellucci A. Mitochondrial dysfunction and  $\alpha$ -synuclein synaptic pathology in Parkinson's disease: who's on first? *Parkinson's Dis.* 2015; 2015.
30. Brown P, Oliviero A, Mazzone P, Insola A, Tonali P, Di Lazzaro V. Dopamine dependency of oscillations between subthalamic nucleus and pallidum in Parkinson's disease. *J Neurosci.* 2001; 21:1033–1038. <https://doi.org/10.1523/JNEUROSCI.21-03-01033.2001> PMID: 11157088
31. Wang SY, Aziz TZ, Stein JF, Liu X. Time-frequency analysis of transient neuromuscular events: Dynamic changes in activity of the subthalamic nucleus and forearm muscles related to the intermittent resting tremor. *J Neurosci Methods.* 2005; 145:151–158. <https://doi.org/10.1016/j.jneumeth.2004.12.009> PMID: 15922033
32. Timmermann L, Gross J, Dirks M, Volkmann J, Freund HJ, Schnitzler A. The cerebral oscillatory network of parkinsonian resting tremor. *Brain.* 2003; 126:199–212. <https://doi.org/10.1093/brain/awg022> PMID: 12477707
33. Weinberger M, Mahant N, Hutchison WD, Lozano AM, Moro E, Hodaie M, et al. Beta oscillatory activity in the subthalamic nucleus and its relation to dopaminergic response in Parkinson's disease. *J Neurophysiol.* 2006; 96:3248–3256. <https://doi.org/10.1152/jn.00697.2006> PMID: 17005611
34. Tass P, Smirnov D, Karavaev A, Barnikol U, Barnikol T, Adamchic I, et al. The causal relationship between subcortical local field potential oscillations and Parkinsonian resting tremor. *J Neural Eng.* 2010; 7:016009. <https://doi.org/10.1088/1741-2560/7/1/016009>
35. Marsden J, Limousin-Dowsey P, Ashby P, Pollak P, Brown P. Subthalamic nucleus, sensorimotor cortex and muscle interrelationships in Parkinson's disease. *Brain.* 2001; 124:378–388. <https://doi.org/10.1093/brain/124.2.378> PMID: 11157565

36. Williams D, Tijssen M, van Bruggen G, Bosch A, Insola A, Di Lazzaro V, et al. Dopamine-dependent changes in the functional connectivity between basal ganglia and cerebral cortex in humans. *Brain*. 2002; 125:1558–1569. <https://doi.org/10.1093/brain/awf156> PMID: 12077005
37. Levy R, Hutchison WD, Lozano AM, Dostrovsky JO. Synchronized neuronal discharge in the basal ganglia of parkinsonian patients is limited to oscillatory activity. *J Neurosci*. 2002; 22:2855–2861.
38. Levy R, Ashby P, Hutchison WD, Lang AE, Lozano AM, Dostrovsky JO. Dependence of subthalamic nucleus oscillations on movement and dopamine in Parkinson's disease. *Brain*. 2002; 125:1196–1209. <https://doi.org/10.1093/brain/awf128> PMID: 12023310
39. Kühn AA, Trottenberg T, Kivi A, Kupsch A, Schneider GH, Brown P. The relationship between local field potential and neuronal discharge in the subthalamic nucleus of patients with Parkinson's disease. *Exp Neurol*. 2005; 194:212–220. <https://doi.org/10.1016/j.expneurol.2005.02.010> PMID: 15899258
40. Rivlin-Etzion M, Marmor O, Heimer G, Raz A, Nini A, Bergman H. Basal ganglia oscillations and pathophysiology of movement disorders. *Curr Opin Neurobiol*. 2006; 16:629–637. <https://doi.org/10.1016/j.conb.2006.10.002> PMID: 17084615
41. Bergman H, Feingold A, Nini A, Raz A, Slovlin H, Abeles M, et al. Physiological aspects of information processing in the basal ganglia of normal and parkinsonian primates. *Trends Neurosci*. 1998; 21:32–38. [https://doi.org/10.1016/S0166-2236\(97\)01151-X](https://doi.org/10.1016/S0166-2236(97)01151-X) PMID: 9464684
42. Beudel M, Oswal A, Jha A, Foltynie T, Zrinzo L, Hariz M, et al. Oscillatory Beta Power Correlates With Akinesia-Rigidity in the Parkinsonian Subthalamic Nucleus. *Mov Disord*. 2017; 32:174–175. <https://doi.org/10.1002/mds.26860> PMID: 27859589
43. Kühn AA, Kupsch A, Schneider GH, Brown P. Reduction in subthalamic 8–35 Hz oscillatory activity correlates with clinical improvement in Parkinson's disease. *Euro J Neurosci*. 2006; 23:1956–1960. <https://doi.org/10.1111/j.1460-9568.2006.04717.x>
44. Eusebio A, Thevathasan W, Gaynor LD, Pogosyan A, Bye E, Foltynie T, et al. Deep brain stimulation can suppress pathological synchronisation in parkinsonian patients. *J Neurol Neurosurg Psychiatry*. 2011; 82:569–573. <https://doi.org/10.1136/jnnp.2010.217489> PMID: 20935326
45. Tachibana Y, Iwamuro H, Kita H, Takada M, Nambu A. Subthalamo-pallidal interactions underlying parkinsonian neuronal oscillations in the primate basal ganglia. *Eur J Neurosci*. 2011; 34:1470–1484. <https://doi.org/10.1111/j.1460-9568.2011.07865.x> PMID: 22034978
46. Pavlides A, Hogan SJ, Bogacz R. Computational models describing possible mechanisms for generation of excessive beta oscillations in Parkinson's disease. *PLoS Comput Biol*. 2015; 11:e1004609. <https://doi.org/10.1371/journal.pcbi.1004609> PMID: 26683341
47. Shouno O, Tachibana Y, Nambu A, Doya K. Computational model of recurrent subthalamo-pallidal circuit for generation of parkinsonian oscillations. *Front Neuroanat*. 2017; 11. <https://doi.org/10.3389/fnana.2017.00021> PMID: 28377699
48. Wilson HR, Cowan JD. A mathematical theory of the functional dynamics of cortical and thalamic nervous tissue. *Kybernetik*. 1973; 13:55–80. <https://doi.org/10.1007/BF00288786> PMID: 4767470
49. Nunez PL. Wave-like properties of the alpha rhythm. *IEEE Trans Biomed Eng*. 1974; 21:473–482. <https://doi.org/10.1109/TBME.1974.324336>
50. Wright J, Liley D. Dynamics of the brain at global and microscopic scales: Neural networks and the EEG. *Behav Brain Sci*. 1996; 19:285–295. <https://doi.org/10.1017/S0140525X00042679>
51. Jirsa VK, Haken H. Field theory of electromagnetic brain activity. *Phys Rev Lett*. 1996; 77:960–963. <https://doi.org/10.1103/PhysRevLett.77.960> PMID: 10062950
52. Robinson PA, Rennie CJ, Wright JJ. Propagation and stability of waves of electrical activity in the cerebral cortex. *Phys Rev E*. 1997; 56:826–840. <https://doi.org/10.1103/PhysRevE.56.826>
53. Robinson PA, Rennie CJ, Wright JJ, Bourke PD. Steady states and global dynamics of electrical activity in the cerebral cortex. *Phys Rev E*. 1998; 58:3351–3357. <https://doi.org/10.1103/PhysRevE.58.3357>
54. Robinson PA, Rennie CJ, Wright JJ, Bahramali H, Gordon E, Rowe DL. Prediction of electroencephalographic spectra from neurophysiology. *Phys Rev E*. 2001; 63:021903. <https://doi.org/10.1103/PhysRevE.63.021903>
55. Robinson PA, Rennie CJ, Rowe DL. Dynamics of large-scale brain activity in normal arousal states and epileptic seizures. *Phys Rev E*. 2002; 65:041924. <https://doi.org/10.1103/PhysRevE.65.041924>
56. Robinson PA, Rennie CJ, Rowe DL, O'Connor SC, Gordon E. Multiscale brain modelling. *Phil Trans R Soc B*. 2005; 360:1043–1050. <https://doi.org/10.1098/rstb.2005.1638> PMID: 16087447
57. Rennie CJ, Robinson PA, Wright JJ. Effects of local feedback on dispersion of electrical waves in the cerebral cortex. *Phys Rev E*. 1999; 59:3320–3329. <https://doi.org/10.1103/PhysRevE.59.3320>

58. Deco G, Jirsa VK, Robinson PA, Breakspear M, Friston K. The dynamic brain: from spiking neurons to neural mass and cortical fields. *PLoS Comput Biol*. 2008; 4: e1000092:1–35. <https://doi.org/10.1371/journal.pcbi.1000092>
59. Steyn-Ross ML, Steyn-Ross DA, Sleigh JW. Modelling general anaesthesia as a first-order phase transition in the cortex. *Progress in biophysics and molecular biology*. 2004; 85:369–385. <https://doi.org/10.1016/j.pbiomolbio.2004.02.001> PMID: 15142753
60. Liley D, Bojak I. Understanding the transition to seizure by modeling the epileptiform activity of general anesthetic agents. *J Clin Neurophysiol*. 2005; 22:300–313. PMID: 16357635
61. Breakspear M, Roberts JA, Terry JR, Rodrigues S, Mahant N, Robinson PA. A unifying explanation of primary generalized seizures through nonlinear brain modeling and bifurcation analysis. *Cereb Cortex*. 2006; 16:1296–1313. <https://doi.org/10.1093/cercor/bhj072> PMID: 16280462
62. Roberts JA, Robinson PA. Modeling absence seizure dynamics: implications for basic mechanisms and measurement of thalamocortical and corticothalamic latencies. *J Theor Biol*. 2008; 253:189–201. <https://doi.org/10.1016/j.jtbi.2008.03.005> PMID: 18407293
63. van Albada SJ, Robinson PA. Mean-field modeling of the basal ganglia-thalamocortical system. I. Firing rates in healthy and parkinsonian states. *J Theor Biol*. 2009; 257:642–663. <https://doi.org/10.1016/j.jtbi.2008.12.018> PMID: 19168074
64. van Albada SJ, Gray RT, Drysdale PM, Robinson PA. Mean-field modeling of the basal ganglia-thalamocortical system. II. Dynamics of Parkinsonian oscillations. *J Theor Biol*. 2009; 257:664–688. <https://doi.org/10.1016/j.jtbi.2008.12.013> PMID: 19154745
65. Müller E, van Albada S, Kim J, Robinson P. Unified neural field theory of brain dynamics underlying oscillations in Parkinson's disease and generalized epilepsies. *J Theor Biol*. 2017;.
66. Wilson HR, Cowan JD. Excitatory and inhibitory interactions in localized populations of model neurons. *Biophys J*. 1972; 12:1. [https://doi.org/10.1016/S0006-3495\(72\)86068-5](https://doi.org/10.1016/S0006-3495(72)86068-5) PMID: 4332108
67. Freeman WJ. Mass action in the nervous system. New York: Academic Press; 1975.
68. Burns BD. Some properties of isolated cerebral cortex in the unanaesthetized cat. *J Physiol*. 1951; 112:156. <https://doi.org/10.1113/jphysiol.1951.sp004517> PMID: 14825189
69. Chervin R, Pierce P, Connors B. Periodicity and directionality in the propagation of epileptiform discharges across neocortex. *J Neurophysiol*. 1988; 60:1695–1713. <https://doi.org/10.1152/jn.1988.60.5.1695> PMID: 3143812
70. Golomb D, Amitai Y. Propagating neuronal discharges in neocortical slices: computational and experimental study. *J Neurophysiol*. 1997; 78:1199–1211. <https://doi.org/10.1152/jn.1997.78.3.1199> PMID: 9310412
71. Beurl RL. Properties of a mass of cells capable of regenerating pulses. *Philos Trans R Soc Lond, B, Biol Sci*. 1956; 240:55–94. <https://doi.org/10.1098/rstb.1956.0012>
72. Bressloff PC. Traveling fronts and wave propagation failure in an inhomogeneous neural network. *Physica D*. 2001; 155:83–100. [https://doi.org/10.1016/S0167-2789\(01\)00266-4](https://doi.org/10.1016/S0167-2789(01)00266-4)
73. Bressloff PC, Folias SE, Prat A, Li YX. Oscillatory waves in inhomogeneous neural media. *Phys Rev Lett*. 2003; 91:178101. <https://doi.org/10.1103/PhysRevLett.91.178101> PMID: 14611379
74. Jirsa VK, Haken H. A derivation of a macroscopic field theory of the brain from the quasimicroscopic neural dynamics. *Physica D*. 1997; 99:503–516. [https://doi.org/10.1016/S0167-2789\(96\)00166-2](https://doi.org/10.1016/S0167-2789(96)00166-2)
75. Nunez PL. *Neocortical Dynamics and Human EEG Rhythms*. Oxford: Oxford Uni. Press; 1995.
76. Robinson PA, Rennie CJ, Rowe DL, O'Connor SC. Estimation of multiscale neurophysiologic parameters by electroencephalographic means. *Hum Brain Mapp*. 2004; 23:53–72. <https://doi.org/10.1002/hbm.20032> PMID: 15281141
77. Rowe DL, Robinson PA, Rennie CJ. Estimation of neurophysiological parameters from the waking EEG using a biophysical model of brain dynamics. *J Theor Biol*. 2004; 231:413–433. <https://doi.org/10.1016/j.jtbi.2004.07.004> PMID: 15501472
78. Braitenberg V, Schüz A. *Cortex: Statistics and Geometry of Neuronal Connectivity*, 2nd ed. Berlin: Springer-Verlag; 1998.
79. Sanz-Leon P, Robinson PA, Knock SA, Drysdale PM, Abeysuriya RG, Fung PK, et al. NFTsim: Theory and Simulation of Multiscale Neural Field Dynamics. *bioRxiv*. 2018;
80. Ranck JB. Which elements are excited in electrical stimulation of mammalian central nervous system: a review. *Brain Res*. 1975; 98:417–440. [https://doi.org/10.1016/0006-8993\(75\)90364-9](https://doi.org/10.1016/0006-8993(75)90364-9) PMID: 1102064
81. Holsheimer J, Demeulemeester H, Nuttin B, De Sutter P. Identification of the target neuronal elements in electrical deep brain stimulation. *Eur J Neurosci*. 2000; 12:4573–4577. <https://doi.org/10.1111/j.1460-9568.2000.01306.x> PMID: 11122371

82. Rattay F, Wenger C. Which elements of the mammalian central nervous system are excited by low current stimulation with microelectrodes? *Neurosci*. 2010; 170:399–407. <https://doi.org/10.1016/j.neuroscience.2010.07.032>
83. Wilson MT, Goodwin D, Brownjohn P, Shemmell J, Reynolds JN. Numerical modelling of plasticity induced by transcranial magnetic stimulation. *J Comp Neurosci*. 2014; 36:499–514. <https://doi.org/10.1007/s10827-013-0485-1>
84. Wilson M, Fung P, Robinson P, Shemmell J, Reynolds J. Calcium dependent plasticity applied to repetitive transcranial magnetic stimulation with a neural field model. *J Comp Neurosci*. 2016; 41:107–125. <https://doi.org/10.1007/s10827-016-0607-7>
85. Hellwig B, Häussler S, Lauk M, Guschlbauer B, Köster B, Kristeva-Feige R, et al. Tremor-correlated cortical activity detected by electroencephalography. *Clin Neurophysiol*. 2000; 111:806–809. [https://doi.org/10.1016/S1388-2457\(00\)00248-0](https://doi.org/10.1016/S1388-2457(00)00248-0) PMID: 10802450
86. Hirschmann J, Schoffelen J, Schnitzler A, van Gerven M. Parkinsonian rest tremor can be detected accurately based on neuronal oscillations recorded from the subthalamic nucleus. *Clin Neurophysiol*. 2017; 128:2029–2036. <https://doi.org/10.1016/j.clinph.2017.07.419> PMID: 28841506
87. Dovzhenok A, Rubchinsky LL. On the origin of tremor in Parkinson's disease. *PLoS one*. 2012; 7:e41598. <https://doi.org/10.1371/journal.pone.0041598> PMID: 22848541
88. Fogelson N, Kühn AA, Silberstein P, Limousin PD, Hariz M, Trottenberg T, et al. Frequency dependent effects of subthalamic nucleus stimulation in Parkinson's disease. *Neurosci Lett*. 2005; 382:5–9. <https://doi.org/10.1016/j.neulet.2005.02.050> PMID: 15911112
89. Chen CC, Litvak V, Gilbertson T, Křhna A, Lu CS, Lee ST, et al. Excessive synchronization of basal ganglia neurons at 20 Hz slows movement in Parkinson's disease. *Exp Neurol*. 2007; 205:214–221. <https://doi.org/10.1016/j.expneurol.2007.01.027> PMID: 17335810
90. Vallabhajosula S, Haq IU, Hwynn N, Oyama G, Okun M, Tillman MD, et al. Low-frequency versus high-frequency subthalamic nucleus deep brain stimulation on postural control and gait in Parkinson's disease: a quantitative study. *Brain Stim*. 2015; 8:64–75. <https://doi.org/10.1016/j.brs.2014.10.011>
91. Roberts J, Robinson PA. Quantitative theory of driven nonlinear brain dynamics. *Neuroimage*. 2012; 62:1947–1955. <https://doi.org/10.1016/j.neuroimage.2012.05.054> PMID: 22652022
92. Herrmann CS. Human EEG responses to 1–100 Hz flicker: resonance phenomena in visual cortex and their potential correlation to cognitive phenomena. *Exp Brain Res*. 2001; 137:346–353. <https://doi.org/10.1007/s002210100682> PMID: 11355381
93. Sidiropoulos C, Walsh R, Meaney C, Poon Y, Fallis M, Moro E. Low-frequency subthalamic nucleus deep brain stimulation for axial symptoms in advanced Parkinson's disease. *J Neurol*. 2013; 260:2306–2311. <https://doi.org/10.1007/s00415-013-6983-2> PMID: 23749331
94. Little S, Pogosyan A, Neal S, Zavala B, Zrinzo L, Hariz M, et al. Adaptive deep brain stimulation in advanced Parkinson disease. *Ann Neurol*. 2013; 74:449–457. <https://doi.org/10.1002/ana.23951> PMID: 23852650
95. Li S, Arbutnot GW, Jutras MJ, Goldberg JA, Jaeger D. Resonant antidromic cortical circuit activation as a consequence of high-frequency subthalamic deep-brain stimulation. *J Neurophysiol*. 2007; 98:3525–3537. <https://doi.org/10.1152/jn.00808.2007> PMID: 17928554
96. Miocinovic S, Parent M, Butson CR, Hahn PJ, Russo GS, Vitek JL, et al. Computational analysis of subthalamic nucleus and lenticular fasciculus activation during therapeutic deep brain stimulation. *J Neurophysiol*. 2006; 96:1569–1580. <https://doi.org/10.1152/jn.00305.2006>
